# Supplementary material for: Systematic identification of transcription factors associated with patient survival in cancers
Source: PubMed Central journal article supplement (PMC2686740; doi:10.1186/1471-2164-10-225), 2009-05-15

**(A)**

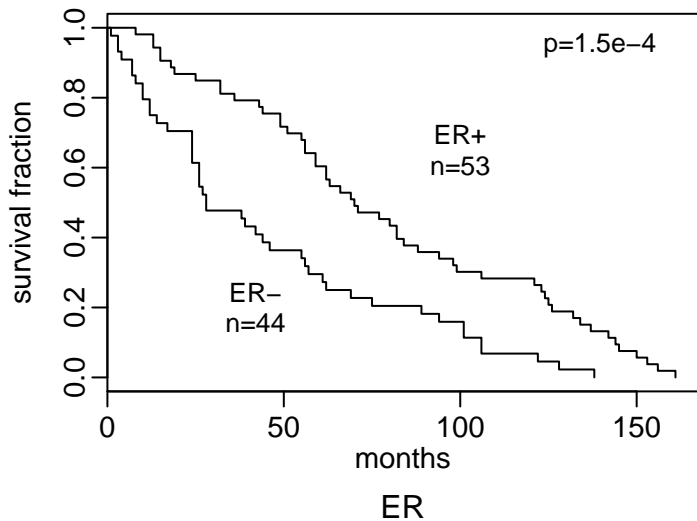

Supplement: 1471-2164-10-225-S2.pdf [file 1471-2164-10-225-S2.pdf]
